# Supplementary material for: Inadequate Choline Intake in Pregnant Women in Germany
Source: Nutrients. 2022 Nov 17;14(22):4862. doi: 10.3390/nu14224862 (PMC9696170; doi:10.3390/nu14224862)
Supplement: Supplementary file 1 [file nutrients-14-04862-s001.zip › nutrients-1991343-supplementary.pdf]

## Supplementary Materials

Figure S1: Derivation of study sample.

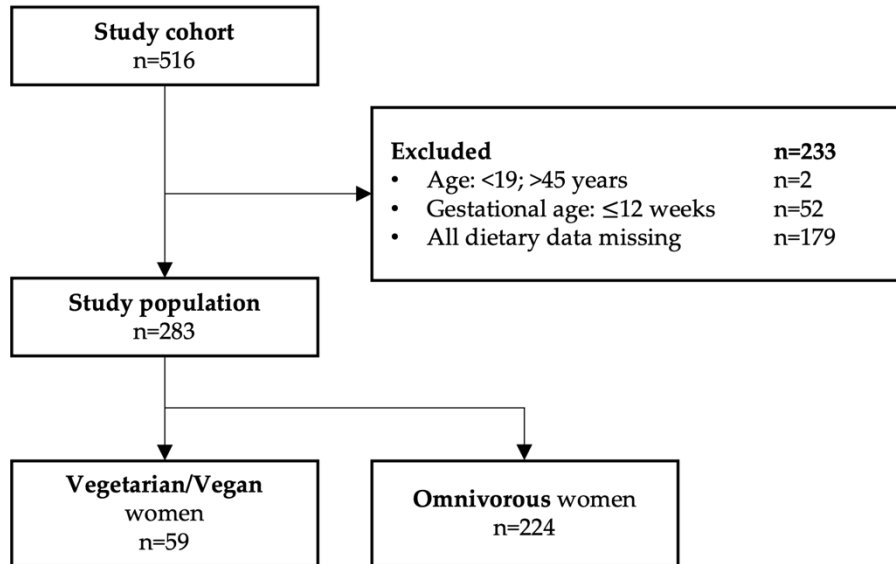

Figure S2: Original questionnaire in German language with an example of the drop-down list used for the food frequency questionnaire.

**Schwangerschaft und Gesundheit**

\* 1. In welcher Schwangerschaftswoche befinden Sie sich?

\* 2. Die wievielte Schwangerschaft ist diese?

3. Wie viele Tage hatten Sie seit Schwangerschaftsbeginn Übelkeit oder Erbrechen?

4. Hatten Sie Erbrechen mit Gewichtsverlust?

☐ Ja

☐ Nein

## Ernährung und Ernährungsverhalten

\* 5. Ernähren Sie sich nach einer besonderen Ernährungsweise?

- ☐ Nein
- ☐ Besondere Ernährung wegen Nahrungsmittelunverträglichkeit(en)
- ☐ Vegetarisch
- ☐ Vegan
- ☐ Sonstiges (bitte angeben)

6. Welche Nahrungsmittelunverträglichkeit(en) haben Sie?

7. Haben Sie Ihre Ernährung aufgrund der Schwangerschaft umgestellt?

- ☐ Nein
- ☐ Ja, weil

8. Welche der folgenden Vitamine und Mineralstoffe nehmen Sie seit der Feststellung der Schwangerschaft bzw. seit Beginn des Kinderwunsches in Form von Tabletten, Pulvern oder Säften zu sich?

- ☐ Keine
- ☐ Vitamin A
- ☐ Vitamin B1
- ☐ Vitamin B2
- ☐ Vitamin B6
- ☐ Vitamin B12
- ☐ Vitamin D
- ☐ Folsäure
- ☐ Eisen
- ☐ Jod
- ☐ Magnesium
- ☐ Calcium
- ☐ Sonstiges (bitte angeben)

\* 9. Nehmen bzw. nahmen Sie cholinhaltige Nahrungsergänzungsmittel zu sich?

☐ Nein

☐ Ja (Bitte geben Sie den Namen des Nahrungsergänzungsmittels ein)

10. Seit wann nehmen bzw. nahmen Sie cholinhaltige Nahrungsergänzungsmittel zu sich? (*Mehrfachnennungen möglich!*)

☐ Vor Beginn der Schwangerschaft

☐ Im ersten Trimester (1. - 12. SSW)

☐ Im zweiten Trimester (13. - 28. SSW)

☐ Im dritten Trimester (29. - 40. SSW)

11. Wie oft nehmen Sie cholinhaltige Nahrungsergänzungsmittel zu sich?

☐ Weniger als einmal die Woche

☐ 5x/ Woche

☐ 1x/ Woche

☐ 6x/ Woche

☐ 2x/ Woche

☐ Täglich

☐ 3x/ Woche

☐ 2-3x/ täglich

☐ 4x/ Woche

☐ Sonstiges (bitte angeben)

12. Wie viel mg Cholin enthalten eine Dosis Ihres Nahrungsergänzungsmittels?

\* 13. Wurde Ihnen die Einnahme von cholinhaltigen Nahrungsergänzungsmitteln empfohlen?

☐ Ja

☐ Nein

14. Von wem wurde ihnen die Einnahme von cholinhaltigen Nahrungsergänzungsmitteln empfohlen?

☐ Ärztin/ Arzt

☐ Ernährungsfachkraft

☐ Hebamme

☐ Bekannte/ Verwandte

☐ Heilpraktiker\*in

☐ Sonstige (bitte angeben)

## Verzehrhäufigkeiten von Lebensmitteln

Wie oft haben Sie die folgenden Lebensmittel im Verlauf der letzten Woche zu sich genommen?

*Bitte richten Sie sich nach den angegebenen Portionsgrößen beim Einschätzen des wöchentlichen Verzehrs.*

*Eine Portion entspricht dabei den angezeigten Mengen. Sollten Portionsgrößen nicht in dem Bild zu sehen sein, ist eine weitere Beschreibung unterhalb des Bildes zu finden.*

*Wenn Sie sich nicht ganz sicher sind, schätzen Sie bitte.*

*Viel Spaß beim weiteren Ausfüllen des Fragebogens.*

### \* 15. Getränke

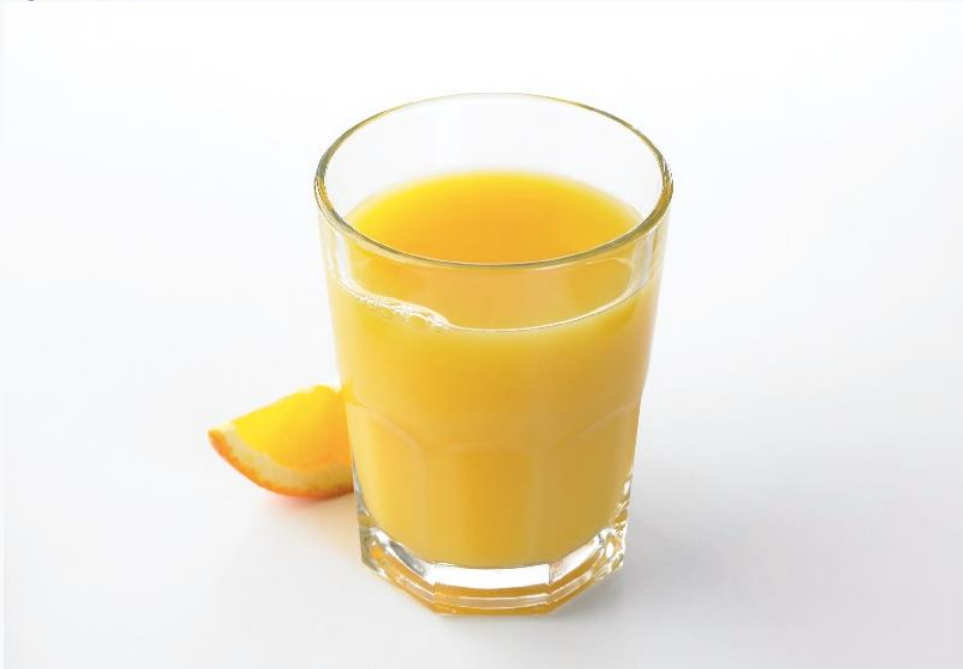

Eine Portion entspricht einem Glas von 200ml.

|                                                           | Glas/ Gläser         |
|-----------------------------------------------------------|----------------------|
| Zuckerhaltige Erfrischungsgetränke<br>z.B. Cola, Malzbier | <input type="text"/> |
| Fruchtsaft aus z.B. Orange, Apfel                         | <input type="text"/> |
| Gemüsesaft aus z.B. Karotte, Tomate                       | <input type="text"/> |
| Früchte-/ Kräutertee                                      | <input type="text"/> |

\* 16. Getreide-/ Vollkornprodukte

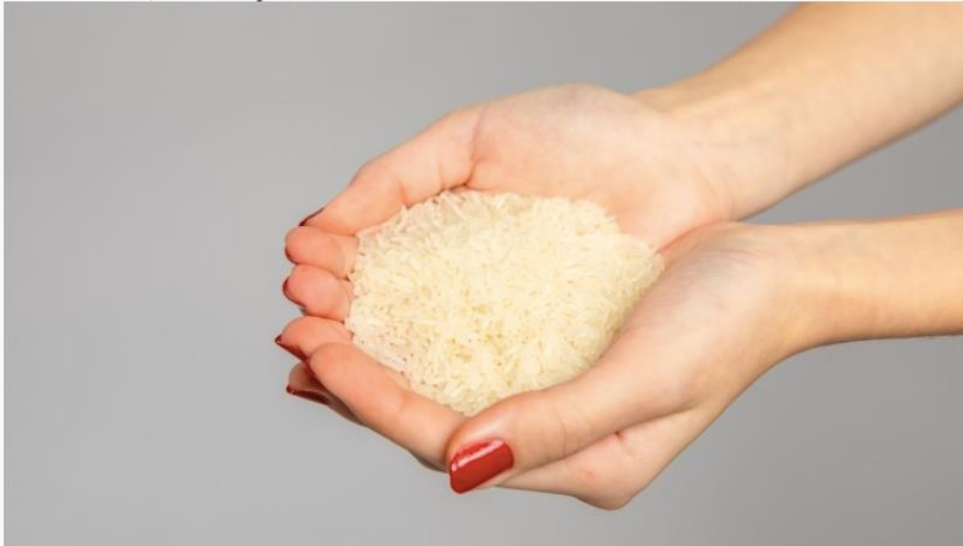

*Eine Scheibe Brot bedeckt die gesamte Handfläche mit ausgestreckten Fingern.*

|                                           |    |  |
|-------------------------------------------|----|--|
|                                           | 8  |  |
|                                           | 9  |  |
|                                           | 10 |  |
| Cornflakes                                | 11 |  |
| Müsli                                     | 12 |  |
| Scheibe Vollkornbrot/<br>Vollkornbrötchen | 13 |  |
| Scheibe Graubrot/<br>Mischbrot            | 14 |  |
| Scheibe Weißbrot/<br>Brötchen             | 15 |  |
|                                           | 16 |  |
|                                           | 17 |  |
| Reis                                      | 18 |  |
|                                           | 19 |  |
|                                           | 20 |  |
| Getreide z.B. Couscous<br>oder Bulgur     | 21 |  |
|                                           | 22 |  |
| Nudeln                                    | 23 |  |
|                                           | 24 |  |
| Kartoffeln                                |    |  |

\* 17. Brotbelag

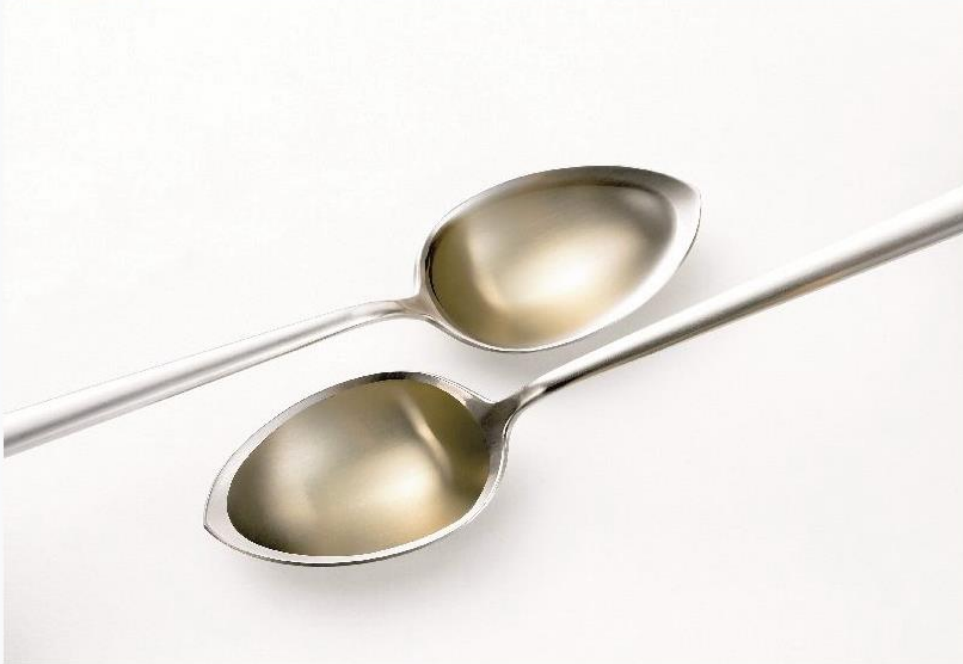

Eine Portion entspricht einem Esslöffel bzw. einer Scheibe.

|                                                      | Portion(en)                    |
|------------------------------------------------------|--------------------------------|
| Butter oder Margarine                                | <input type="text" value="1"/> |
| Frischkäse                                           | <input type="text" value="1"/> |
| Käse                                                 | <input type="text" value="1"/> |
| vegetarische/ vegane<br>Streichcreme                 | <input type="text" value="1"/> |
| Salami                                               | <input type="text" value="1"/> |
| Schinken                                             | <input type="text" value="1"/> |
| Fleischwurst                                         | <input type="text" value="1"/> |
| Honig oder Marmelade                                 | <input type="text" value="1"/> |
| Nusscreme z.B.<br>Erdnusscreme, Nuss-<br>Nougatcreme | <input type="text" value="1"/> |

\* 18. Milchprodukte und Eier

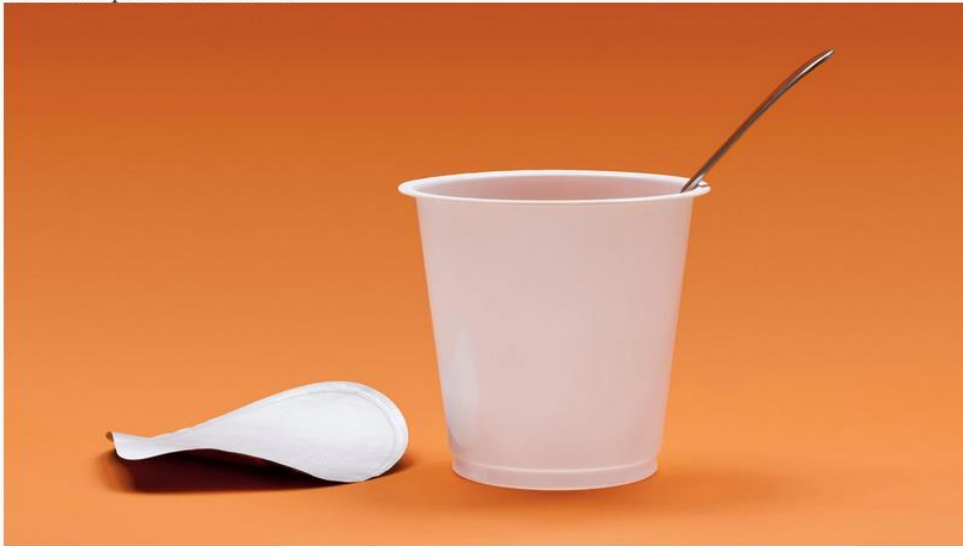

*Eine Portion Milch entspricht einem Glas von 200ml (s. Frage 16).*

|                                                   | Portion(en)          |
|---------------------------------------------------|----------------------|
| Ein Glas Milch                                    | <input type="text"/> |
| Ein Becher (125g)<br>Quark/ Joghurt/<br>Dickmilch | <input type="text"/> |
| Ei z.B. Spiegelei,<br>Rührei                      | <input type="text"/> |

\* 19. Fleisch/ -waren

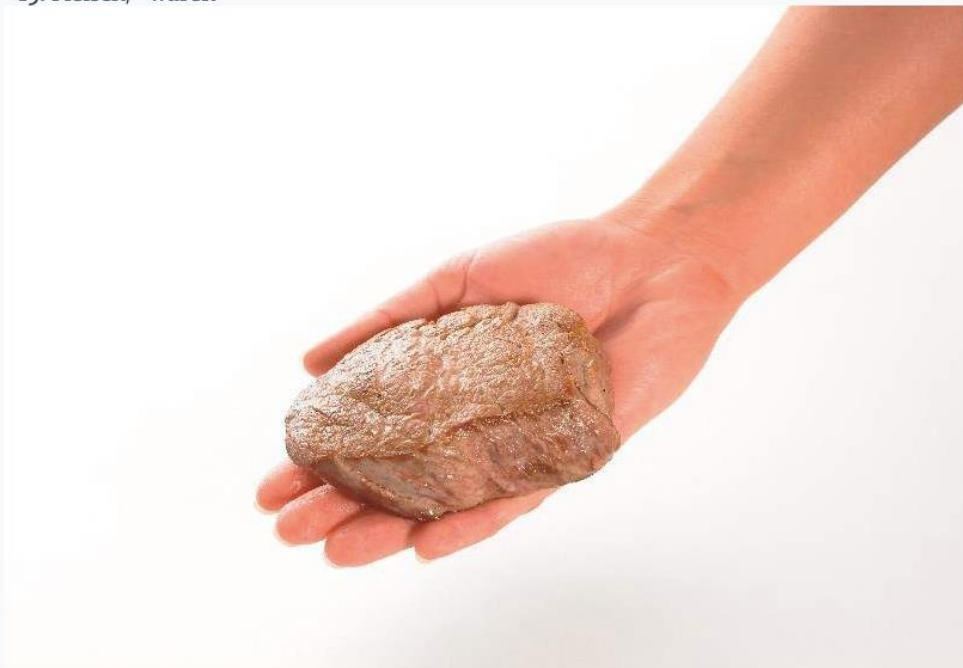

*Eine Portion Fleisch entspricht der Größe des Handtellers.*

|                                                       |                      |
|-------------------------------------------------------|----------------------|
| Portion(en)                                           |                      |
| Weißes Fleisch z.B.<br>Hähnchen                       | <input type="text"/> |
| Rotes Fleisch z.B.<br>Schweinefleisch,<br>Rindfleisch | <input type="text"/> |
| Innereien z.B. Leber,<br>Niere                        | <input type="text"/> |

\* 20. Fisch und Meeresfrüchte

*Eine Portion entspricht der Größe des Handtellers (s. Frage 20).*

|                                            |                      |
|--------------------------------------------|----------------------|
| Portion(en)                                |                      |
| Fettreicher Fisch z.B.<br>Lachs, Thunfisch | <input type="text"/> |
| Fettarmer Fisch z.B.<br>Scholle, Forelle   | <input type="text"/> |
| Krustentiere z.B.<br>Krabben, Krebs        | <input type="text"/> |
| Muscheln                                   | <input type="text"/> |

\* 21. Obst

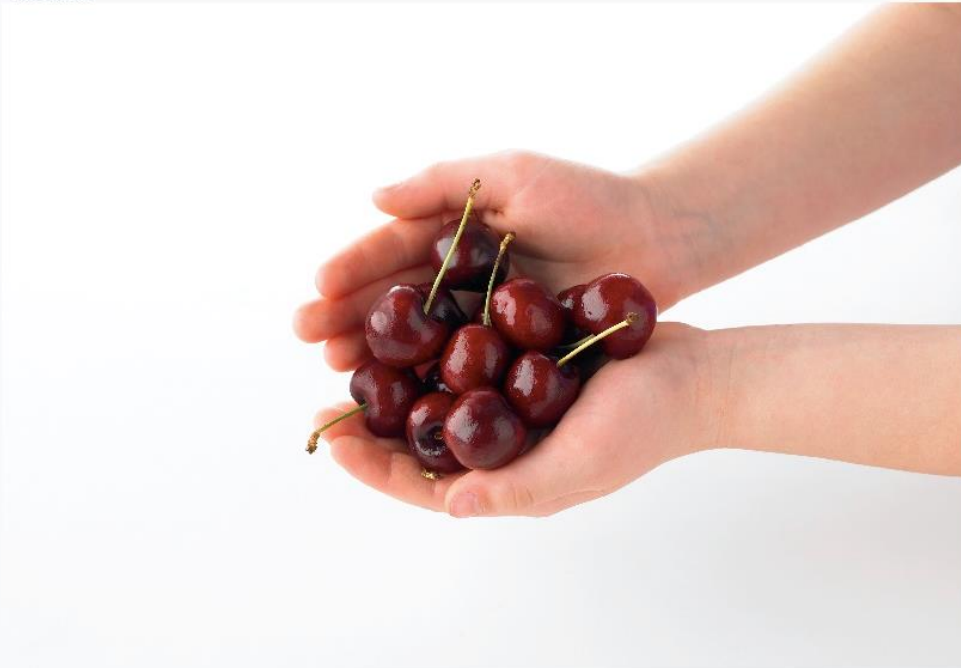

*Eine Portion entspricht zwei Hände zu einer Schale gehalten für zerkleinertes oder kleinstückiges Obst/ Gemüse oder eine Portion entspricht einem Stück Obst/ Gemüse (s. Frage 23).*

|                                    |                      |
|------------------------------------|----------------------|
| Portion(en)                        |                      |
| Kernobst z.B. Apfel,<br>Birne      | <input type="text"/> |
| Steinobst z.B. Kirsche,<br>Marille | <input type="text"/> |
| Beeren z.B. Erdbeeren,<br>Himbeere | <input type="text"/> |
| Südfrüchte z.B.<br>Banane, Kiwi    | <input type="text"/> |

\* 22. Gemüse

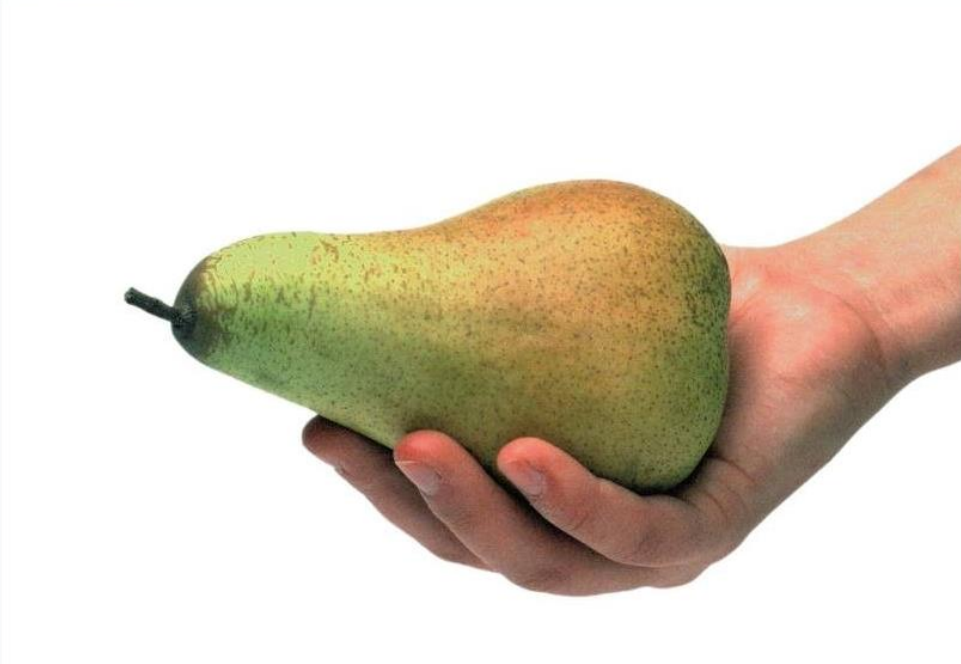

*Eine Portion entspricht einem Stück Obst/ Gemüse oder zwei Hände zur Schale gehalten für zerkleinertes oder kleinstückiges Obst/ Gemüse (s. Frage 22).*

|                                                  | Portion(en)                    |
|--------------------------------------------------|--------------------------------|
| Weißes Kohlgemüse<br>z.B. Weißkohl,<br>Chinakohl | <input type="text" value="1"/> |
| Grünes Kohlgemüse<br>z.B. Brokkoli,<br>Rosenkohl | <input type="text" value="1"/> |
| Diverse Gemüse z.B.<br>Tomate, Gurke,<br>Paprika | <input type="text" value="1"/> |
| Pilze                                            | <input type="text" value="1"/> |

\* 23. Hülsenfrüchte

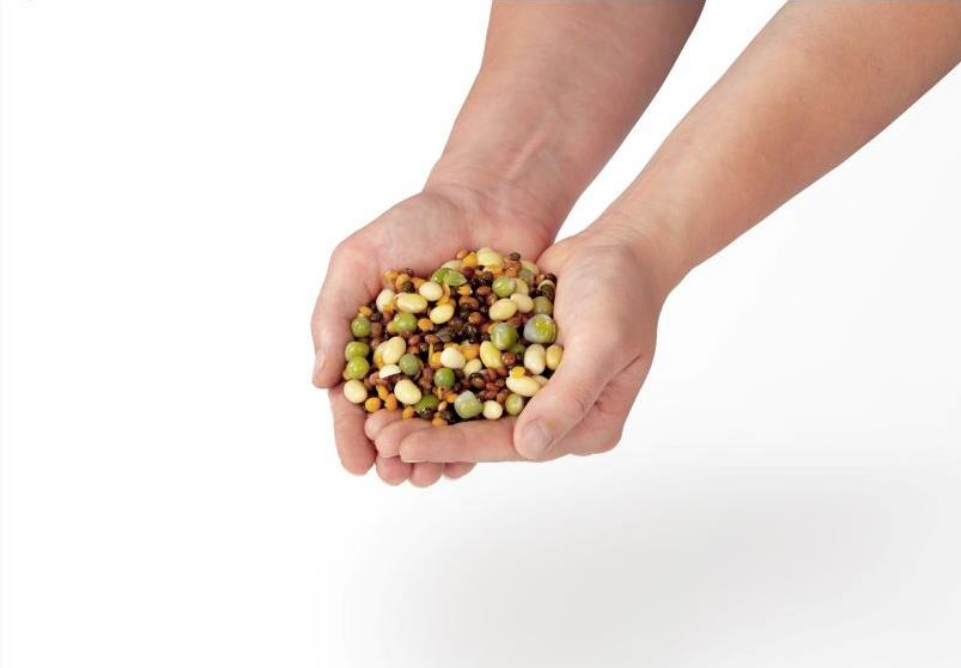

Eine Portion Hülsenfrüchte passt in zwei Hände.

|             | Portion(en)          |
|-------------|----------------------|
| Brechbohnen | <input type="text"/> |
| Tofu        | <input type="text"/> |
| Erbsen      | <input type="text"/> |
| Linsen      | <input type="text"/> |
| Bohnensamen | <input type="text"/> |

\* 24. Nüsse und Samen

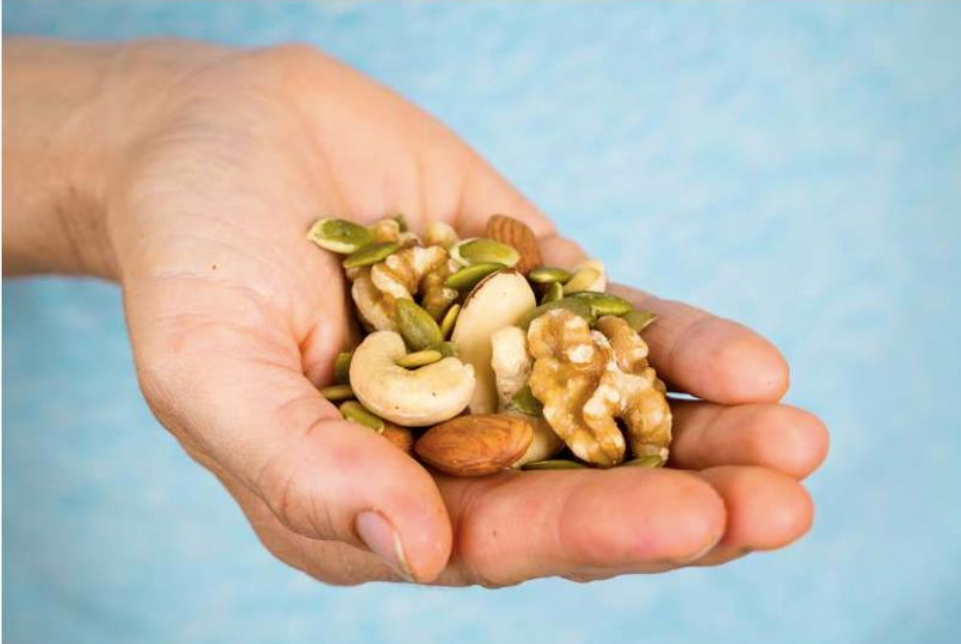

Eine Portion Nüsse und Samen passt in eine Hand.

|                   | Portion(en)          |
|-------------------|----------------------|
| Sesam             | <input type="text"/> |
| Walnuss           | <input type="text"/> |
| Paranuss          | <input type="text"/> |
| Macadamianuss     | <input type="text"/> |
| Haselnuss         | <input type="text"/> |
| Erdnuss           | <input type="text"/> |
| Sonnenblumenkerne | <input type="text"/> |
| Pinienkerne       | <input type="text"/> |
| Cashewnuss        | <input type="text"/> |

\* 25. Sonstiges

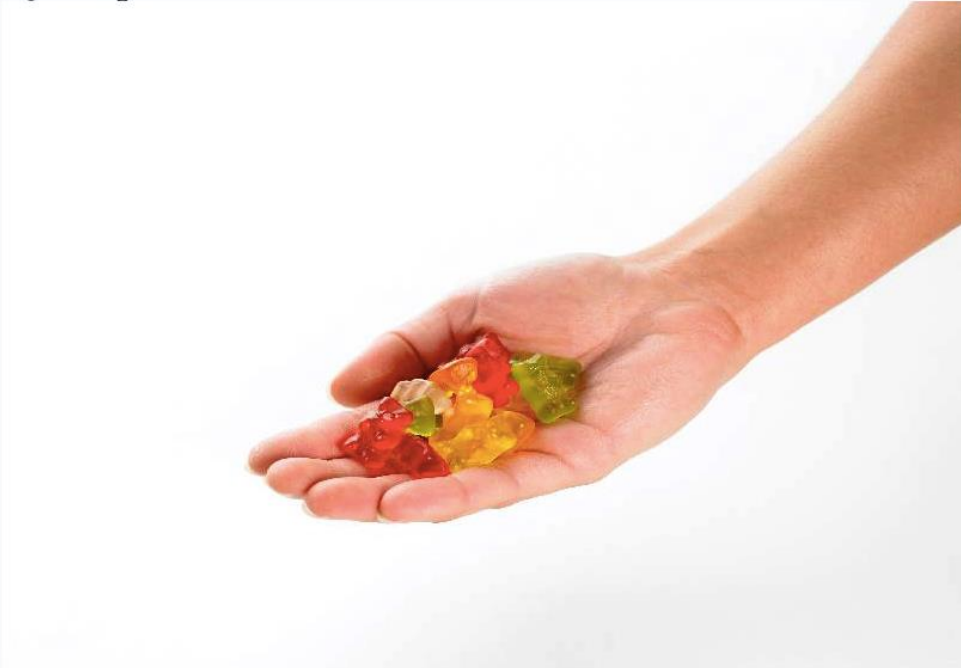

Eine Portion Süßigkeiten passt in eine Hand.

|                                                           | Portion(en)                    |
|-----------------------------------------------------------|--------------------------------|
| Eine Hand Süßigkeiten<br>z.B. Schokolade,<br>Gummibärchen | <input type="text" value="1"/> |
| Ein Stück Kuchen oder<br>Torte                            | <input type="text" value="1"/> |
| Fast Food z.B. eine<br>Pizza, ein Hamburger               | <input type="text" value="1"/> |

\* 26. Fette

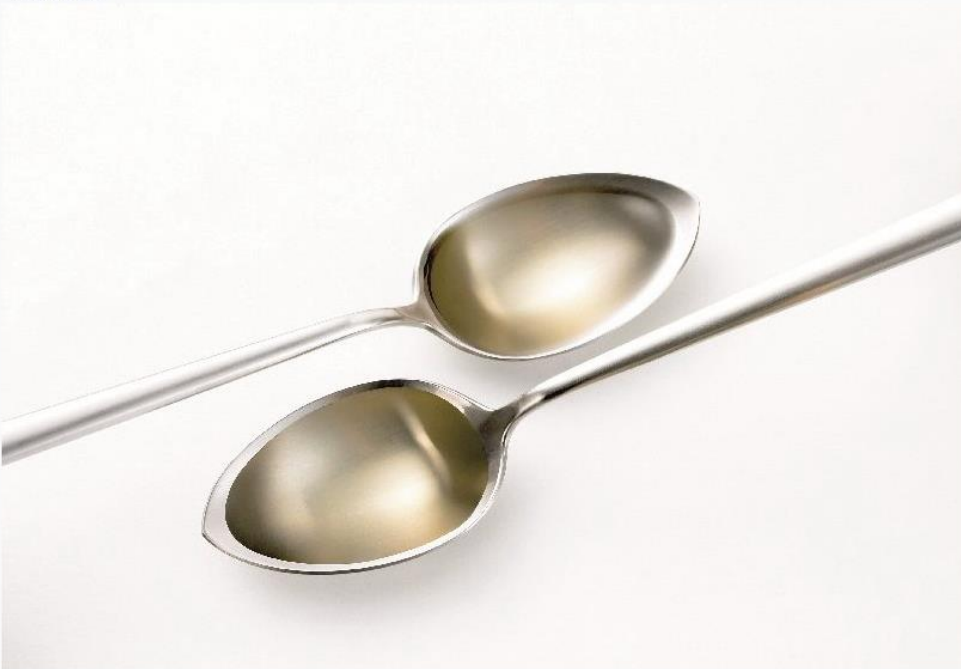

Eine Portion entspricht zwei Esslöffeln

|                                                 | Portion(en)          |
|-------------------------------------------------|----------------------|
| Butter/<br>Margarine                            | <input type="text"/> |
| Olivenöl                                        | <input type="text"/> |
| Pflanzliches<br>Kochfett z.B.<br>Baskin, Palmin | <input type="text"/> |
| Tierisches<br>Kochfett z.B.<br>Schmalz          | <input type="text"/> |
| Sonnenblumenöl                                  | <input type="text"/> |
| Weizenkeimöl                                    | <input type="text"/> |
| Sonstiges                                       | <input type="text"/> |

Sonstiges (bitte angeben)

## Angaben zur Person

\* 27. Wie alt sind Sie?

- ☐ < 19
 ☐ 19-25
 ☒ 26-30
 ☐ 31-35
- ☐ 36-40
 ☐ 41-45
 ☐ > 45

28. Wie ist Ihre familiäre Situation?

- ☐ Lebe alleine (ledig, geschieden,...)
- ☐ Lebe mit meinem/meiner Partner\*in
- ☐ Lebe mit Familie (Partner\*in, Kind(er),...)
- ☐ Sonstiges (bitte angeben)

29. Was ist Ihr höchster erreichter Bildungsabschluss?

- ☐ (Noch) keinen Schulabschluss
- ☐ Hauptschulabschluss
- ☐ Realschulabschluss (Mittlere Reife, Fachoberschulreife, o.Ä.)
- ☐ Sonstiges (bitte angeben)
- ☐ Abitur (allgemeine Hochschulreife), fachgebundene Hochschulreife oder Fachhochschulreife
- ☐ (Fach-) Hochschulabschluss (Bachelor, Master, Magister, Diplom, Staatsexamen, Promotion)

\* 30. In welchem Bundesland wohnen Sie?

Ende!

Vielen Dank, dass Sie sich die Zeit genommen haben den Fragebogen auszufüllen.  
Wir wünsche Ihnen alles Gute für die weitere Schwangerschaft.

## Translated version with summary of results

### Questionnaire

#### 1. Health and Pregnancy

Table 1-4: Translated questionnaire. Distribution of whole study population is shown in the tables. Values are numbers and percentages according to categories specified in the first column.

|                                                                                             |              |
|---------------------------------------------------------------------------------------------|--------------|
| <b>What gestational week are you in?</b>                                                    |              |
| 13-41                                                                                       | 283 (100%)   |
| <b>How many pregnancies did you have before this one?</b>                                   |              |
| 1.                                                                                          | 134 (47.35%) |
| 2.                                                                                          | 87 (30.74%)  |
| 3.                                                                                          | 44 (15.55%)  |
| 4.                                                                                          | 9 (3.18%)    |
| 5.                                                                                          | 4 (1.41%)    |
| 6.                                                                                          | 1 (0.35%)    |
| 7.                                                                                          | 2 (0.71%)    |
| 8.                                                                                          | 2 (0.71%)    |
| <b>How many days have you had nausea or vomiting since the beginning of your pregnancy?</b> |              |
|                                                                                             |              |
| <b>Did you lose weight due to vomiting?</b>                                                 |              |
| Yes                                                                                         | 54 (19.15%)  |
| No                                                                                          | 228 (80.85%) |

#### 2. Dietary habits and use of dietary supplements

|                                                                                                                                                                                  |              |
|----------------------------------------------------------------------------------------------------------------------------------------------------------------------------------|--------------|
| <b>Do you follow one of the following diets?</b>                                                                                                                                 |              |
| No                                                                                                                                                                               | 207 (73.14%) |
| Certain diet due to intolerances                                                                                                                                                 | 7 (2.47%)    |
| Vegetarian                                                                                                                                                                       | 43 (15.19%)  |
| Vegan                                                                                                                                                                            | 13 (4.59%)   |
| Others (please specify)                                                                                                                                                          | 13 (4.59%)   |
| <b>What kind of intolerances?</b>                                                                                                                                                |              |
| Open question                                                                                                                                                                    |              |
| <b>Did you change your dietary habits due to pregnancy?</b>                                                                                                                      |              |
| No                                                                                                                                                                               | 227 (80.21%) |
| Yes                                                                                                                                                                              | 56 (19.79%)  |
| <b>Which of the following vitamins and minerals have you been taking in the form of tablets, powders or juices since you became pregnant or started trying to have children?</b> |              |
| None                                                                                                                                                                             | 9 (3.20%)    |
| Vitamin A                                                                                                                                                                        | 49 (17.44%)  |
| Vitamin B1                                                                                                                                                                       | 81 (28.83%)  |
| Vitamin B2                                                                                                                                                                       | 83 (29.54 %) |
| Vitamin B6                                                                                                                                                                       | 94 (33.45%)  |
| Vitamin B12                                                                                                                                                                      | 139 (49.47%) |
| Vitamin D                                                                                                                                                                        | 146 (51.96%) |
| Folic Acid                                                                                                                                                                       | 256 (91.10%) |
| Iron                                                                                                                                                                             | 111 (39.50%) |
| Iodine                                                                                                                                                                           | 142 (50.53%) |
| Magnesium                                                                                                                                                                        | 139 (49.47%) |
| Calcium                                                                                                                                                                          | 62 (22.06%)  |

|                                                                      |              |
|----------------------------------------------------------------------|--------------|
| Others (please specify)                                              | 58 (20.64%)  |
| <b>Do you take or have taken choline-containing supplements?</b>     |              |
| No                                                                   | 267 (94.35%) |
| Yes                                                                  | 16 (5.65%)   |
| <b>If you take choline-containing supplements, since when?</b>       |              |
| <b>Multiple answers possible</b>                                     |              |
| Before pregnancy                                                     | 5 (33.33%)   |
| First trimester                                                      | 10 (66.67%)  |
| Second trimester                                                     | 9 (60.00%)   |
| Third trimester                                                      | 6 (40.00%)   |
| <b>How often do you take choline-containing supplements?</b>         |              |
| Less than once a week                                                | 2 (12.50%)   |
| 1 per week                                                           | 0            |
| 2 per week                                                           | 0            |
| 3 per week                                                           | 1 (6.25%)    |
| 4 per week                                                           | 2 (12.50%)   |
| 5 per week                                                           | 0            |
| 6 per week                                                           | 0            |
| Daily                                                                | 10 (62.50%)  |
| 2-3 times per day                                                    | 0            |
| Others (please specify)                                              | 1 (6.25%)    |
| <b>How much choline contains one dose?</b>                           |              |
| Open question                                                        |              |
| <b>Have you been advised to take choline containing supplements?</b> |              |
| No                                                                   | 280 (98.94%) |
| Yes                                                                  | 3 (1.06%)    |
| <b>If yes, who advised it?</b>                                       |              |
| Doctor                                                               | 1 (33.33%)   |
| Midwife                                                              | 0            |
| Alternative practitioner                                             | 1 (33.33%)   |
| Nutritional specialist                                               | 1 (33.33%)   |
| Friends or Relatives                                                 | 0            |
| Others (please specify)                                              | 0            |

### 3. Food Frequency Questionnaire

How often did you consume the following food items/ groups within the last week?

*Please refer to shown hand portion sizes when you estimate your weekly consumption. If there is no respective portion presented in the picture, please refer to the description along the picture. In case of uncertainty, please estimate appropriately.*

*All the best for the rest of the questionnaire.*

|                                      |                              |
|--------------------------------------|------------------------------|
| <b>Drinks</b>                        |                              |
| Sugary Soft Drinks                   | Choose between 0-30 portions |
| Fruit juice                          |                              |
| Vegetable juice                      |                              |
| Tea                                  |                              |
| <b>Cereals or wholemeal products</b> |                              |
| Cornflakes                           |                              |
| Muesli                               |                              |
| Whole grain bread                    |                              |
| Rye bread                            |                              |

|                                  |  |
|----------------------------------|--|
| White bread                      |  |
| Rice                             |  |
| Grains like couscous             |  |
| Pasta                            |  |
| Potatoes                         |  |
| <b>Bread topping</b>             |  |
| Butter or margarine              |  |
| Cream cheese                     |  |
| Cheese                           |  |
| Vegetarian/ vegan alternatives   |  |
| Salami                           |  |
| Ham                              |  |
| Pork sausage                     |  |
| Honey or jam                     |  |
| Nut cream like peanut butter     |  |
| <b>Milk products and eggs</b>    |  |
| Milk (200 ml)                    |  |
| Yoghurt (125 g)                  |  |
| Egg                              |  |
| Meat and meat products           |  |
| White meat like poultry          |  |
| Red meat                         |  |
| Offal like liver, kidneys ...    |  |
| <b>Fish and Sea Food</b>         |  |
| Fatty fish                       |  |
| Lean fish                        |  |
| Crustacea                        |  |
| Mussels                          |  |
| <b>Fruits</b>                    |  |
| Pome fruit like apples and pears |  |
| Stone fruit like cherry          |  |
| Berries                          |  |
| Southern fruits                  |  |
| <b>Vegetable</b>                 |  |
| White kale                       |  |
| Green kale                       |  |
| Diverse vegetables               |  |
| Mushrooms                        |  |
| <b>Legumes</b>                   |  |
| Green beans                      |  |
| Tofu                             |  |
| Peas                             |  |
| Lentils                          |  |
| Beanseeds                        |  |
| <b>Nuts and seeds</b>            |  |
| Sesame                           |  |
| Walnuts                          |  |
| Brazilnut                        |  |
| Macadamia                        |  |

|                 |  |
|-----------------|--|
| Hazelnut        |  |
| Peanut          |  |
| Sunflower seeds |  |
| Pines nuts      |  |
| Cashew          |  |
| Others          |  |

#### Sweets

|           |  |
|-----------|--|
| Cake      |  |
| Fast Food |  |

#### Fats

|                          |  |
|--------------------------|--|
| Butter margarine         |  |
| Olive oil                |  |
| Plant based cooking fat  |  |
| Animal based cooking fat |  |
| Sunflower oil            |  |
| Wheatgerm oil            |  |
| Others                   |  |

#### 4. Background information

##### How old are you?

|         |              |
|---------|--------------|
| <19     | 0            |
| 19 – 25 | 17 (6.01%)   |
| 26 – 30 | 122 (43.11%) |
| 31 – 35 | 112 (39.58%) |
| 36 – 40 | 29 (10.25%)  |
| 41 – 45 | 3 (1.06%)    |
| >45     | 0            |

##### How is your family situation?

|                         |              |
|-------------------------|--------------|
| Live alone              | 3 (1.06%)    |
| Live with partner       | 140 (49.47%) |
| Live with family        | 138 (48.76%) |
| Others (please specify) | 2 (0.71%)    |

##### What is your highest educational degree?

|                         |           |
|-------------------------|-----------|
| No degree               | 0         |
| Secondary School Degree | 4 (1%)    |
| Middle School Degree    | 56 (20%)  |
| High School Degree      | 74 (26%)  |
| University degree       | 144 (51%) |
| Others (please specify) | 5 (2%)    |

##### In which district do you live in Germany?
